# Supplementary material
Source: bioRxiv or medRxiv preprint supplement (https://www.biorxiv.org/highwire/filestream/25598/field_highwire_adjunct_files/0/088807-1.pdf)
Supplement: Supplementary file [file 088807-1.pdf]

Inoculate three freshly streaked single colony to 50 ml of media

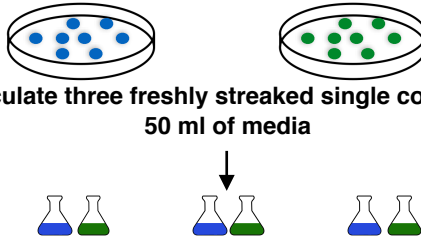

**Ribosome profiling and RNA-Seq**

Grow till OD750=0.6 (mid-log phase).  
Sub-culture into 750ml media

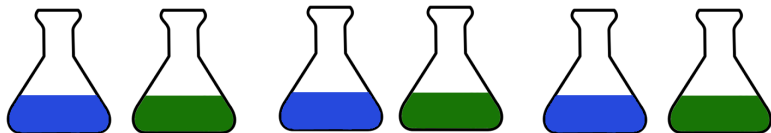

OD750=0.6

filter cells > snap freeze in liquid nitrogen

Pulverise in liquid nitrogen with buffer containing cycloheximide

Thaw powder on ice

Clarify lysate, discard pellet and proceed with supernatants

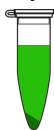

RNase1 digest

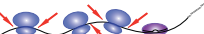

38,000 rpm, 18hr, 4C,  
35% sucrose cushion

Extract RNA from pellet

Total RNA extraction

rRNA subtraction  
by ribo-zero

Alkaline hydrolysis

Size selection (26-34nt)

3' adaptor ligation

5' adaptor ligation

RT-PCR

PCR

2X DSN treatment to remove rRNA

Pool libraries into one tube, sequence all in four lanes of HiSeq2000

**N15 quantitative proteomics**

Inoculate 0.25ml into 20ml of either 14N or 15N media

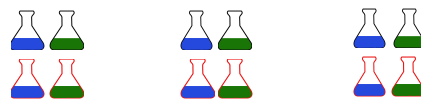

Subculture 0.25ml OD750=0.6, 5 more times for full N15 incorporation

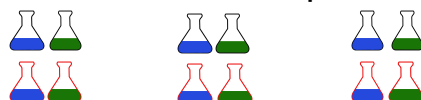

Mix equal number of cells  
(Complement N14 + Mutant N15)

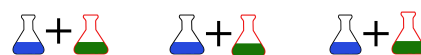

TCA-acetone protein extraction

Denaturing protein gel > Stain >  
Divide lanes into 16 size fractions  
(between 250 and 10 kDa)

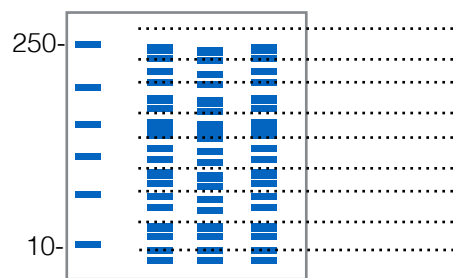

Trypsin digest > LC-MS etc...

**Figure legends**

- DCL3 mutant in N14 media
- DCL3 complement N14 media
- DCL3 mutant in N15 media
- 35% sucrose

### **Supplementary figure 1. Experimental workflow**

Three independent single colonies from freshly streaked *Chlamydomonas*  $\Delta$ DCL3 (green) or complement (blue) were inoculated into 50ml of TAP media and grown until OD<sub>750</sub>=0.6 (mid-log phase). 0.25 ml of each culture was used for N15 incorporation for whole cell proteomics and the remaining culture was used to sub-culture 750ml of TAP for ribosome profiling.

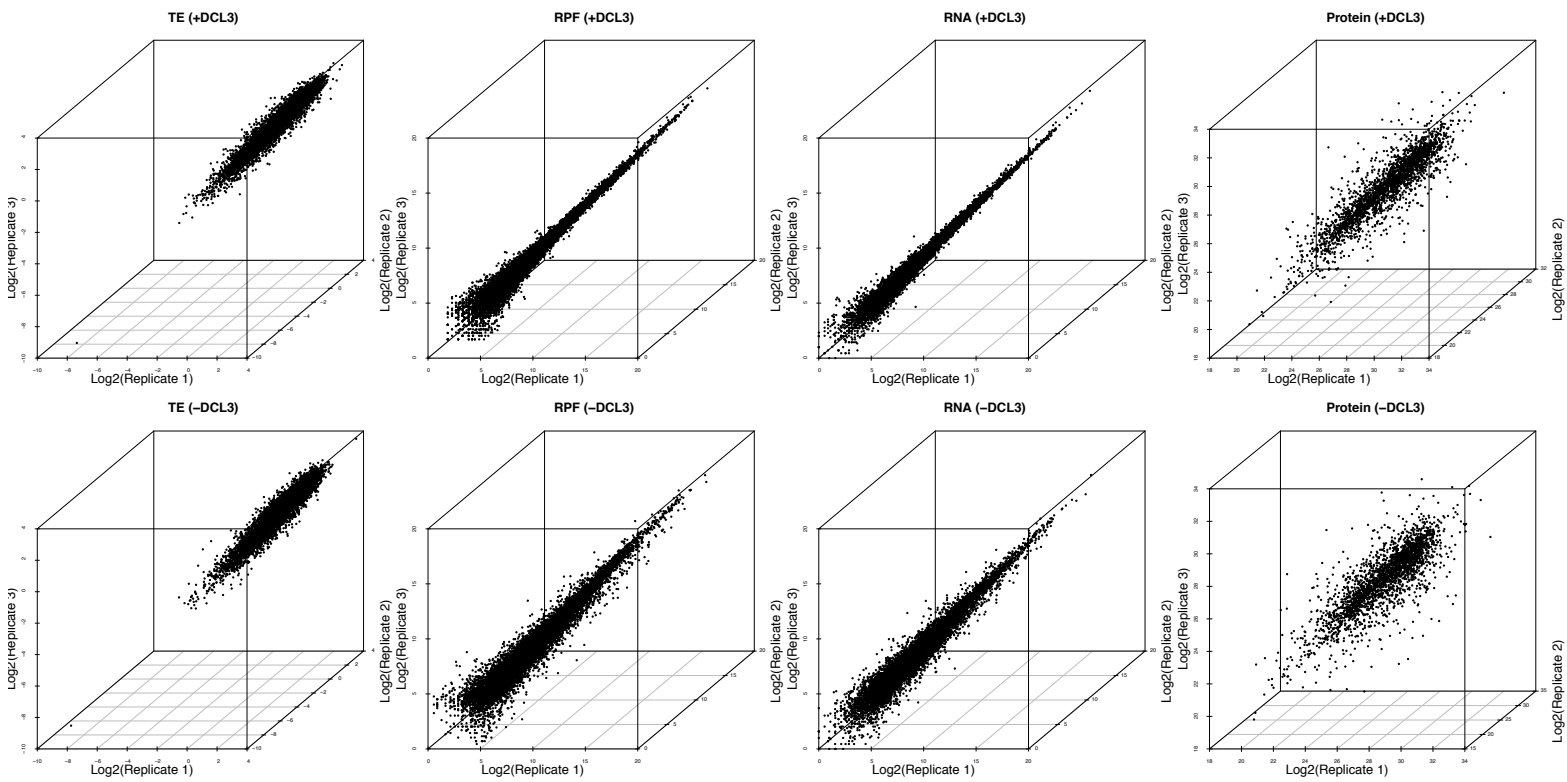

**Supplementary Figure 2. Reproducibility of TE, Ribosome profiling, RNA-Seq and N15 Proteomics**  
 (A)-(D) Correspondence between biological triplicates for DCL3-complements  
 (E)-(H) Correspondence between biological triplicates for DCL3-mutants

|         | library sizes | biorep 1  | biorep 2  | biorep 3  |
|---------|---------------|-----------|-----------|-----------|
| RiboSeq | Complement    | 368,613   | 291,373   | 444,768   |
|         | DCL3          | 515,717   | 461,013   | 590,953   |
| RNA-seq | Complement    | 908,865   | 1,114,867 | 1,223,427 |
|         | DCL3          | 1,166,393 | 1,183,071 | 679,375   |

**Supplementary table 1:** Alignment statistics for each library that maps to the nuclear-encoded transcripts (Phytozome 281).

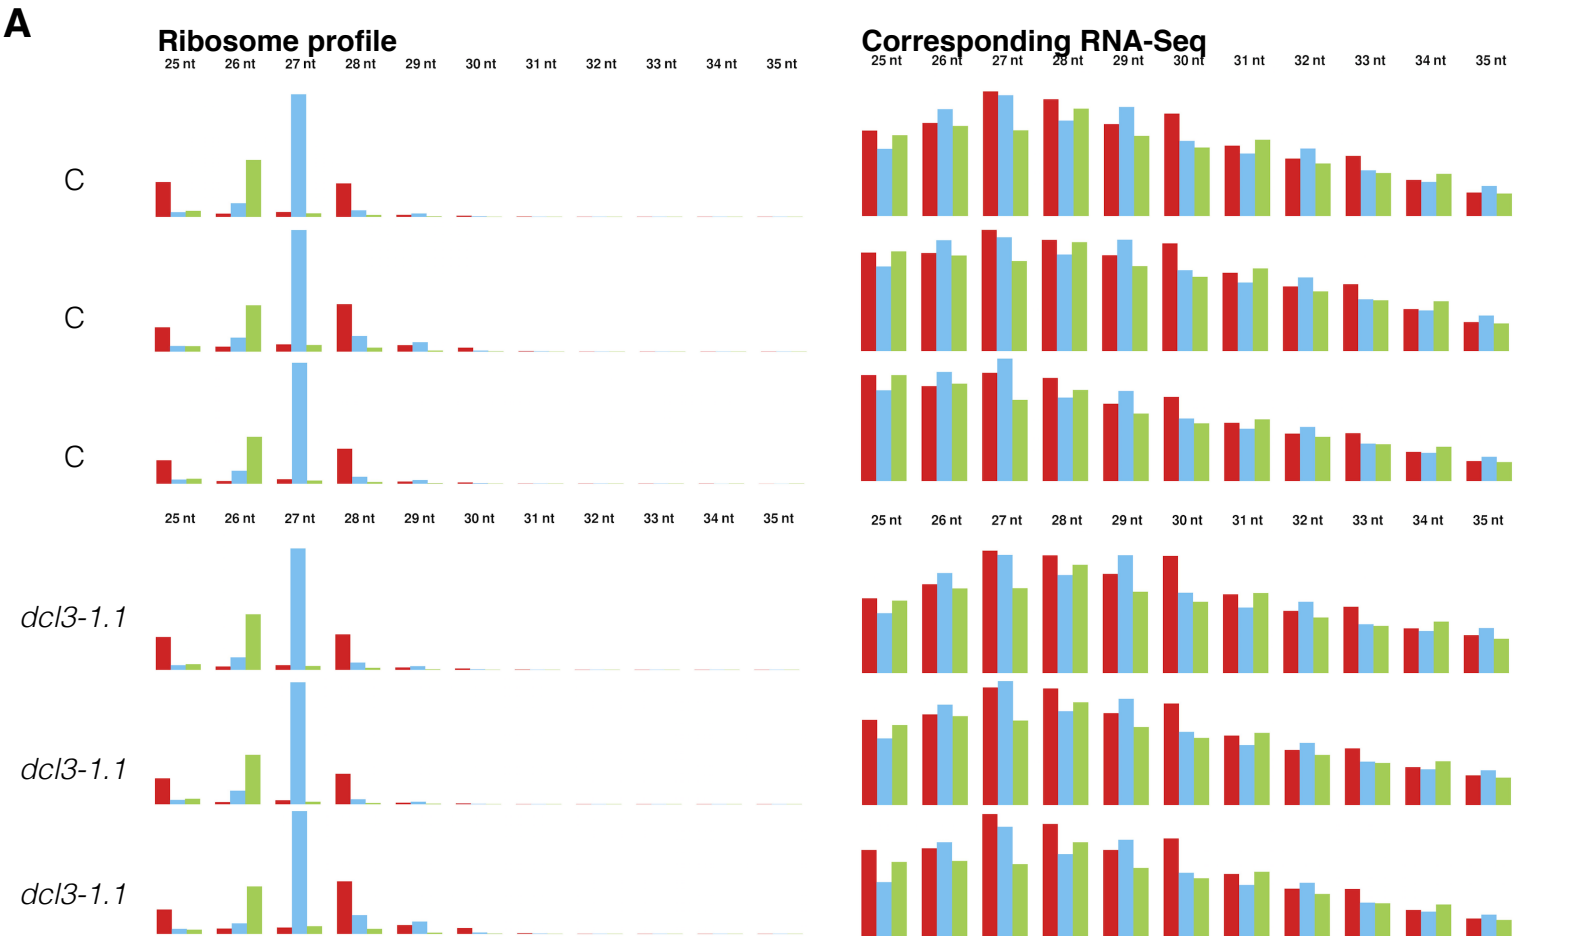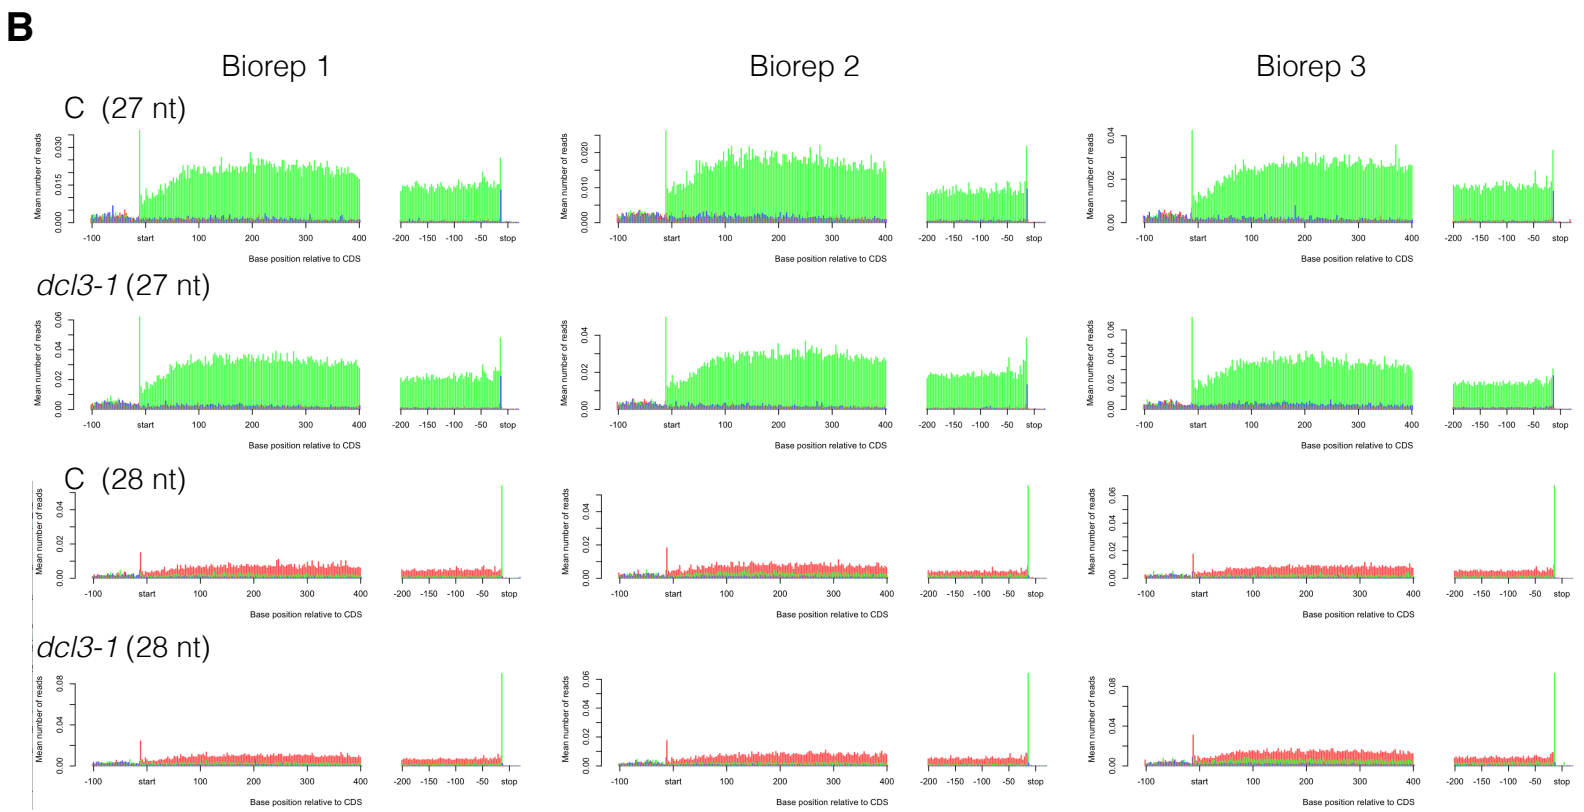

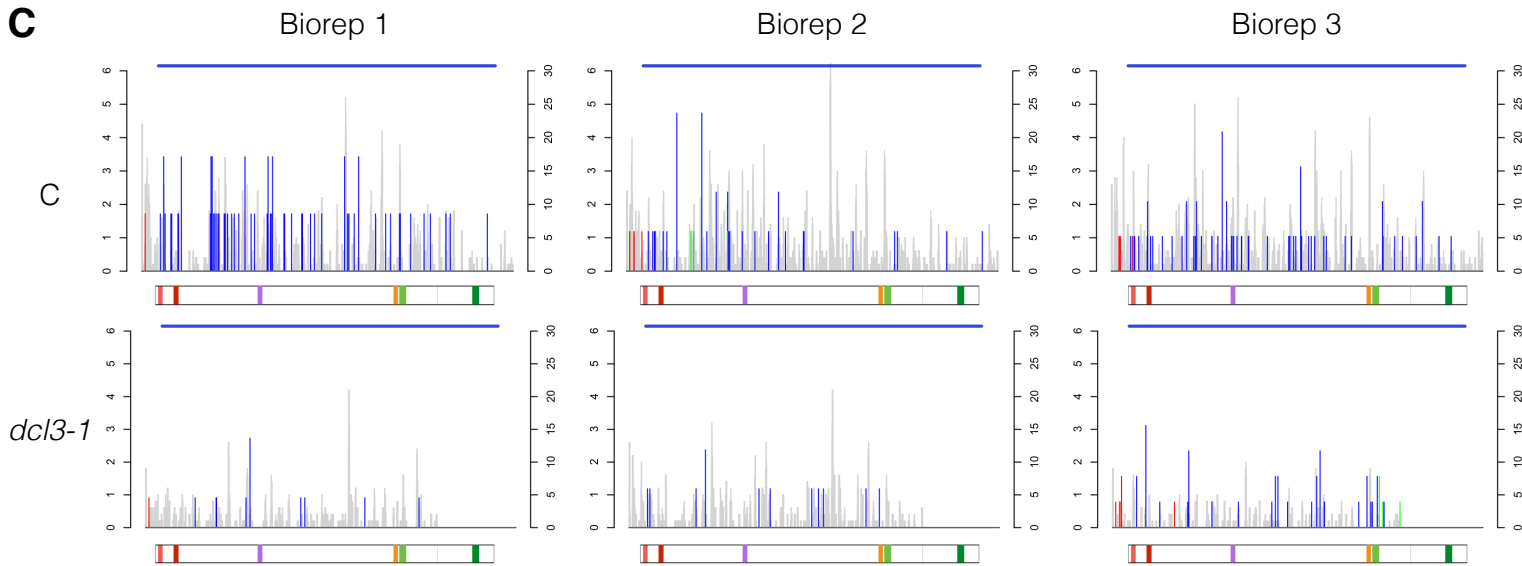

**Supplementary Figure 3: Generation of precise ribosome profiling data:**

- (A) Histogram of positions for all biological triplicates to which the 5' ends of ribosome profile footprints (RPFs) and corresponding RNA-Seq reads map, respectively, as a function of read size class (nt), for reads mapping to the interior region of nuclear-encoded coding ORFs. Red, green and blue bars indicate the proportion of reads that map to codon positions 0, 1 and 2 (respectively).
- (B) Histogram of 5' end positions of 27 and 28-nt RPFs relative to start and stop codons for all biological triplicates. Reads were derived from the complement or DCL3 mutant (respectively) and summed over all transcripts. Phasing is indicated using the same colours as in panels A and B. Histogram of 5' end positions of RPF (coloured, left-axis) and RNA-Seq (grey, right-axis)
- (C) 27-nt reads mapped to DCL3 transcripts in all biological triplicates. The blue horizontal line indicates the *de novo* defined ORF by ribosome profiling of the DCL3 gene (12,219 nt), which corresponds to the annotated CDS (612-12,830 nt). The schematic below the plot shows the domain organisation of DCL3 which contains two DEAD/DEAH box helicase domains (light and dark red boxes), a Helicase C domain (purple box), a proline-rich domain (orange box) and two Ribonuclease III domains a and b (light and dark green boxes, respectively). The thin grey line and the corresponding red arrow indicates the Hygromycin insertion site (nt 10,193) (replicates are shown in Figure S1).

| 3'UTR         | Intron        | CDS           | 3'UTR intron  |
|---------------|---------------|---------------|---------------|
| Cre14.g623850 | Cre04.g229050 | Cre05.g239950 | Cre08.g358535 |
| Cre02.g089850 | Cre01.g035500 |               |               |
| Cre02.g143427 | Cre04.g225700 |               |               |
| Cre02.g143527 | Cre06.g274550 |               |               |
| Cre03.g195950 | Cre06.g296983 |               |               |
| Cre05.g242301 | Cre07.g328400 |               |               |
| Cre10.g465000 | Cre07.g354150 |               |               |
| Cre13.g576700 | Cre12.g537671 |               |               |
| Cre13.g585175 | Cre14.g629200 |               |               |
| Cre13.g585200 | Cre01.g035500 |               |               |
| Cre16.g694950 | Cre02.g143327 |               |               |
| Cre02.g143527 | Cre04.g217925 |               |               |
| Cre24.g755697 | Cre04.g229050 |               |               |
| Cre02.g143527 | Cre08.g358537 |               |               |
| Cre13.g576700 | Cre09.g406983 |               |               |
| Cre16.g694950 | Cre16.g647602 |               |               |
| Cre24.g755697 | Cre07.g341100 |               |               |
| Cre07.g352150 |               |               |               |
| Cre06.g294776 |               |               |               |
| Cre10.g444300 |               |               |               |
| Cre01.g051050 |               |               |               |

**Supplementary table 2: Re-annotation of miRNA precursor-containing mRNA.**







## D Cre24.g755697.t1.1\_136..2328

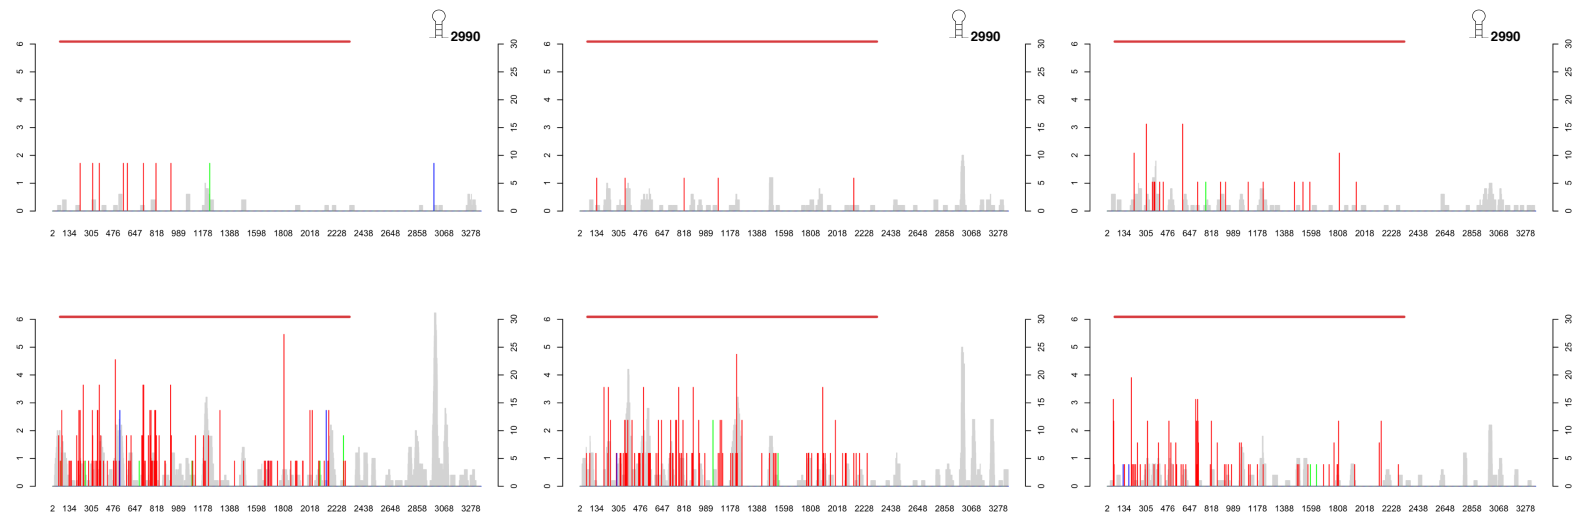

## E Cre10.g444300.t1.2\_241..810

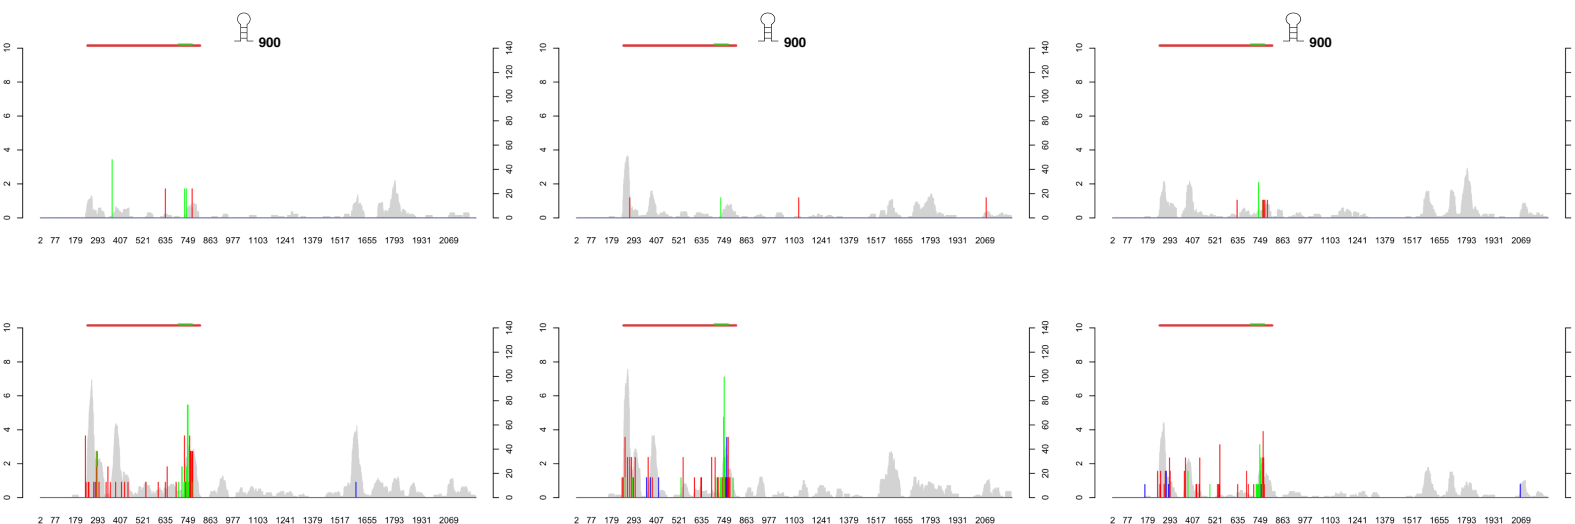

## Supplementary figure 6. DCL3-dependent processing of miRNA occurs in the cytoplasm and down regulates translation efficiency

(A) New annotation for precursor containing transcripts. Yellow circle = precursor-containing CDS, white circle = precursor-containing 3'UTR, orange circle = precursor-containing intron, white circle with red outline = transcripts previously annotated as non-coding transcript but is intact coding and contains miRNA precursor in the 3'UTR. Pearson correlation = 0.07186134 and 0.4858507 for intron and exon-containing transcripts respectively.

(B)-(E) Histogram of normalised 5' end positions of 27-nt RPFs relative to start and stop codons (colour) and corresponding RNA-seq reads (grey). Reads were derived from the complement or DCL3 mutant (top and bottom in biological triplicates, respectively) and summed over all transcripts.

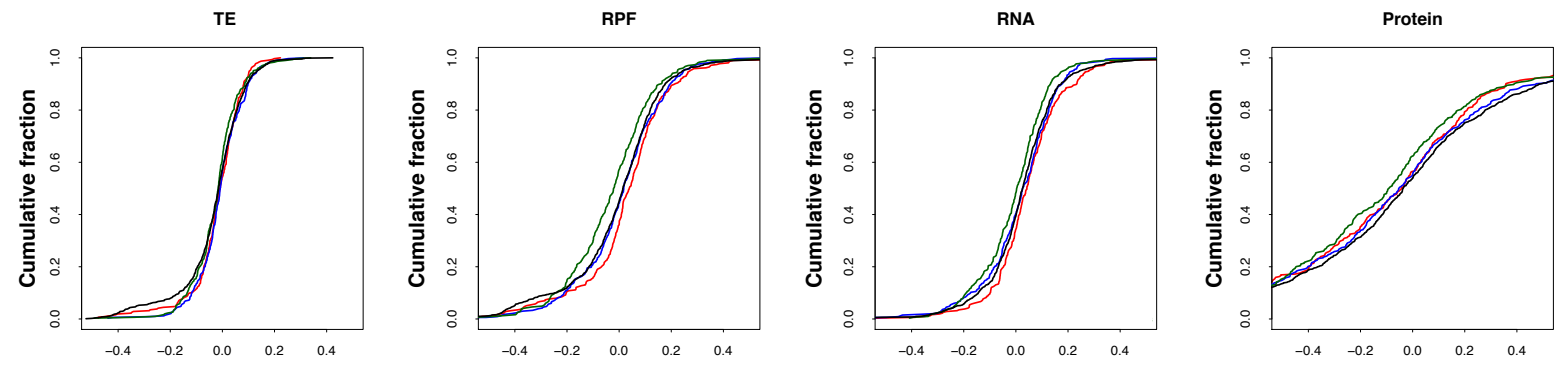

| p-value with non-target (n=911) comparisons | TE   | RPF    | RNA   | Protein |
|---------------------------------------------|------|--------|-------|---------|
| 1 target site (n = 471)                     | 0.07 | 0.0042 | 0.17  | 0.18    |
| 2 target sites (n = 297)                    | 0.12 | 0.55   | 0.48  | 0.81    |
| $\geq 4$ target sites (n = 187)             | 0.22 | 0.0019 | 0.024 | 0.047   |

### Supplementary Figure 7:

Cumulative *dcl3-1* vs C fold-change distributions of TE, RPF, RNA, protein for genes with both NGS and proteomic support and with 0 (black), 1 (red), 2-3 (blue) and 4 or more (green) target sites with corresponding K.S. p-values in the table below.

### Supplementary table3

All mRNAs and their annotation within box A, A', B, B', C and C'. Annotations associated with the translation machinery are highlighted in green, other RNA binding proteins in red. Messenger RNAs with detectable protein in the N15 proteomics data are highlighted in blue

| A (30)                    |                                                                                  |
|---------------------------|----------------------------------------------------------------------------------|
| Cre01.g034600.t1.2        |                                                                                  |
| Cre03.g165215.t1.1        | ubiquitin-like modifier-activating enzyme ATG7                                   |
| <b>Cre04.g222700.t1.2</b> | Elongation factor 3                                                              |
| Cre09.g408950.t1.1        | Autophagy-specific Gee 2, isoform A                                              |
| Cre09.g397450.t1.1        | Dimethylaniline Mnoxygenase                                                      |
| <b>Cre12.g504200.t1.2</b> | Ribosomal protein S23, component of cytosolic 80S ribosome and 40S small subunit |
| <b>Cre17.g701200.t1.2</b> | Ribosomal protein L14, component of cytosolic 80S ribosome and 60S large subunit |
| Cre08.g359450.t1.2        | D-Alanine Ligase                                                                 |
| Cre02.g093850.t1.1        | Ras supressor protein (contains leucine-rich repeats)                            |
| Cre11.g468353.t1.1        | SF14-voltage-gated potassium channel                                             |
| <b>Cre04.g214503.t1.1</b> | Ribosomal protein S12, component of cytosolic 80S ribosome and 40S small subunit |
| <b>Cre02.g091100.t1.2</b> | Ribosomal protein L15, component of cytosolic 80S ribosome and 60S large subunit |
| <b>Cre02.g106600.t1.2</b> | Ribosomal protein S19, component of cytosolic 80S ribosome and 40S small subunit |
| <b>Cre12.g498900.t1.2</b> | Ribosomal protein S7, component of cytosolic 80S ribosome and 40S small subunit  |
| Cre06.g299450.t1.2        |                                                                                  |
| Cre06.g280800.t1.2        | Nuclear auto antigenic sperm protein                                             |
| Cre07.g349950.t1.1        | Transcription initiation factor RFIID subunit 6                                  |
| <b>Cre12.g521200.t1.2</b> | DNA replication factor C complex subunit 1                                       |
| Cre17.g720300.t1.2        | Non-specific serine/threonine protein kinase                                     |
| <b>Cre06.g272950.t1.1</b> | Ribosomal protein S18, component of cytosolic 80S ribosome and 40S small subunit |
| Cre08.g385800.t1.1        |                                                                                  |
| Cre03.g174900.t1.1        | SARM1 (protein binding)                                                          |
| <b>Cre12.g494050.t1.2</b> | Ribosomal protein L9, component of cytosolic 80S ribosome and 60S large subunit  |
| Cre09.g399141.t1.1        | MFS transporter, ACS family, solute carrier family 17                            |
| Cre11.g467560.t1.1        | TPR repeat containing protein                                                    |
| Cre16.g660750.t1.1        | coiled-coil and C2 domain-containing protein 2A                                  |
| <b>Cre07.g357850.t1.2</b> | Ribosomal protein L22, component of cytosolic 80S ribosome and 60S large subunit |
| Cre01.g040850.t1.2        | G Protein-coupled receptor-related protein                                       |
| Cre01.g036800.t1.1        | Diacylglycerol kinase                                                            |
| Cre16.g661588.t1.1        | FAST Leu-Rich Domain-containing protein                                          |

| B (2)              |                                                 |
|--------------------|-------------------------------------------------|
| Cre16.g675200.t1.1 |                                                 |
| Cre06.g281450.t1.1 | Scavenger receptor cysteine rich (SRCR) protein |

|                    |                                                                 |
|--------------------|-----------------------------------------------------------------|
| <b>C (59)</b>      |                                                                 |
| Cre01.g022650.t1.2 | SF9 - BETA-UREIDOPROPIONASE                                     |
| Cre01.g057061.t1.1 | rRNA processing/ ribosome biogenesis (RIX1)                     |
| Cre02.g074800.t2.1 | Adenylate/guanylate cyclase                                     |
| Cre02.g082300.t1.2 |                                                                 |
| Cre02.g089500.t1.2 |                                                                 |
| Cre02.g093750.t1.2 | Nucleoredoxin 2                                                 |
| Cre02.g095080.t1.1 | MAJOR VAULT PROTEIN                                             |
| Cre02.g109100.t1.1 | 3',5'-cyclic-nucleotide phosphodiesterase                       |
| Cre03.g155950.t1.2 |                                                                 |
| Cre03.g170750.t1.2 | Small nucleolar ribonucleoprotein U3 component                  |
| Cre03.g198400.t1.2 |                                                                 |
| Cre03.g199800.t1.1 | Iron hydrogenase                                                |
| Cre03.g200431.t1.1 |                                                                 |
| Cre03.g205450.t1.1 |                                                                 |
| Cre04.g212800.t1.1 |                                                                 |
| Cre04.g224931.t1.1 |                                                                 |
| Cre05.g235700.t1.2 | SAPOSIN-RELATED                                                 |
| Cre06.g271200.t1.2 | NADH oxidase (H(2)O(2)-forming) / H(2)O(2)-forming NADH oxidase |
| Cre06.g278098.t1.1 | Methylcrotonoyl-CoA carboxylase alpha subunit                   |
| Cre06.g281450.t1.1 | Scavenger receptor cysteine rich (SRCR) protein                 |
| Cre06.g288600.t1.1 |                                                                 |
| Cre06.g296700.t1.2 | Hydrogenase assembly factor/biotin synthase                     |
| Cre07.g324500.t1.2 | Gametolysin / Lysin                                             |
| Cre07.g330900.t1.2 | RNA polymerase II transcription factor TFIIA, large chain       |
| Cre07.g348250.t1.2 | GLIOMA SUPPRESSOR CANDIDATE REGION GENE 2                       |
| Cre08.g358564.t1.1 |                                                                 |
| Cre08.g373650.t1.1 |                                                                 |
| Cre09.g388800.t1.2 | Glutamate dehydrogenase                                         |
| Cre09.g396438.t1.1 |                                                                 |
| Cre09.g398250.t1.1 |                                                                 |
| Cre09.g398400.t1.2 | Transient receptor potential ion channel protein                |
| Cre09.g402663.t1.1 |                                                                 |
| Cre09.g405100.t2.1 |                                                                 |
| Cre10.g452250.t1.1 |                                                                 |
| Cre10.g466450.t1.1 | Splicing factor 3b, subunit 4                                   |
| Cre11.g467531.t1.1 | Flagellar Associated Protein                                    |
| Cre11.g477050.t1.1 |                                                                 |

|                    |                                                                             |
|--------------------|-----------------------------------------------------------------------------|
| <b>C (59)</b>      |                                                                             |
| Cre12.g496400.t1.1 |                                                                             |
| Cre12.g499700.t1.1 | MATE efflux family protein                                                  |
| Cre12.g542350.t1.2 | SUGAR UTILIZATION REGULATORY PROTEIN IMP2                                   |
| Cre13.g572272.t1.2 | Collagens (type IV and type XIII), and related proteins                     |
| Cre13.g580900.t1.1 | SERINE/THREONINE-PROTEIN KINASE RIO1                                        |
| Cre14.g623900.t1.1 |                                                                             |
| Cre15.g643503.t1.1 |                                                                             |
| Cre16.g648350.t1.1 | PROLINE OXIDASE                                                             |
| Cre16.g677920.t1.2 |                                                                             |
| Cre16.g683793.t1.1 |                                                                             |
| Cre17.g696950.t1.1 |                                                                             |
| Cre17.g701050.t1.2 | CELL GROWTH-REGULATING NUCLEOLAR PROTEIN                                    |
| Cre17.g701884.t1.1 |                                                                             |
| Cre17.g701950.t1.2 |                                                                             |
| Cre17.g717600.t1.2 |                                                                             |
| Cre17.g718650.t1.2 |                                                                             |
| Cre17.g727801.t1.1 | T-type voltage-gated Ca <sup>2+</sup> channel, pore-forming alpha1I subunit |
| Cre17.g731800.t1.2 |                                                                             |
| Cre17.g740950.t1.2 | High intensity light-inducible Lhc-like gene                                |
| Cre18.g748297.t1.1 |                                                                             |
| Cre18.g749547.t1.1 |                                                                             |
| Cre24.g755997.t1.1 | Cell wall protein pherophorin-C18                                           |

|                    |                                                                       |
|--------------------|-----------------------------------------------------------------------|
| <b>A' (15)</b>     |                                                                       |
| Cre16.g668050.t1.1 | Aspartyl protease (Asp_protease_2)                                    |
| Cre06.g265850.t1.1 | Tail-specific/C-terminal processing peptidase protease                |
| Cre03.g191950.t1.2 | RimM N-terminal domain (RimM)                                         |
| Cre14.g614950.t1.2 | Putative mitochondrial ribosomal protein S2, imported to mitochondria |
| Cre12.g554300.t1.1 | Sodium:solute symporter                                               |
| Cre15.g639050.t1.1 | ZINC FINGER MYND DOMAIN CONTAINING PROTEIN 10                         |
| Cre14.g626800.t1.1 |                                                                       |
| Cre14.g610663.t1.1 |                                                                       |
| Cre06.g271950.t1.2 | GENERAL VESICULAR TRANSPORT FACTOR P115                               |
| Cre07.g318300.t1.1 | CAMP-DEPENDENT PROTEIN KINASE REGULATORY CHAIN                        |
| Cre17.g739850.t1.2 |                                                                       |
| Cre10.g429200.t1.1 | RuBisCO methyltransferase                                             |
| Cre17.g703450.t1.1 |                                                                       |
| Cre14.g623439.t1.1 | Pyrrolidone-carboxylate peptidase                                     |
| Cre14.g626800.t1.1 |                                                                       |

|                    |                                             |
|--------------------|---------------------------------------------|
| <b>C' (36)</b>     |                                             |
| Cre43.g760497.t1.1 |                                             |
| Cre17.g734644.t1.1 |                                             |
| Cre17.g734100.t1.2 |                                             |
| Cre17.g733650.t1.1 | 7-keto-8-aminopelargonic acid synthase      |
| Cre12.g561350.t1.1 |                                             |
| Cre12.g502250.t1.2 | Plastid lipid associated protein            |
| Cre09.g396300.t1.2 | Protoporphyrinogen oxidase                  |
| Cre02.g143547.t1.1 |                                             |
| Cre02.g083800.t2.1 | dTDP-glucose 4,6-dehydratase                |
| Cre02.g076300.t1.1 | Uroporphyrinogen decarboxylase              |
| Cre01.g024050.t1.2 |                                             |
| Cre43.g760547.t1.1 |                                             |
| Cre17.g734200.t1.2 | L,L-diaminopimelate aminotransferase        |
| Cre09.g386137.t1.1 |                                             |
| Cre03.g158000.t1.2 | Glutamate-1-semialdehyde aminotransferase   |
| Cre02.g143467.t1.1 |                                             |
| Cre02.g079650.t1.1 |                                             |
| Cre26.g756597.t1.1 |                                             |
| Cre17.g733950.t1.2 |                                             |
| Cre16.g695850.t1.2 |                                             |
| Cre11.g480250.t1.1 |                                             |
| Cre10.g465550.t1.1 | ClpD chaperone, Hsp100 family               |
| Cre06.g299800.t1.2 |                                             |
| Cre03.g166500.t1.2 |                                             |
| Cre01.g050950.t1.2 |                                             |
| Cre01.g048600.t1.1 |                                             |
| Cre04.g214650.t1.1 | 1,3-beta-D-glucan synthase                  |
| Cre06.g292249.t1.1 |                                             |
| Cre17.g734709.t1.1 |                                             |
| Cre17.g734400.t1.1 | Ubiquitin ligase SCF complex subunit Cullin |
| Cre16.g668300.t1.1 |                                             |
| Cre26.g756897.t1.1 |                                             |
| Cre17.g734350.t1.1 |                                             |
| Cre17.g733800.t1.1 |                                             |
| Cre05.g242000.t1.2 | Magnesium chelatase subunit D               |
| Cre17.g734250.t1.1 |                                             |

# All expressed genes

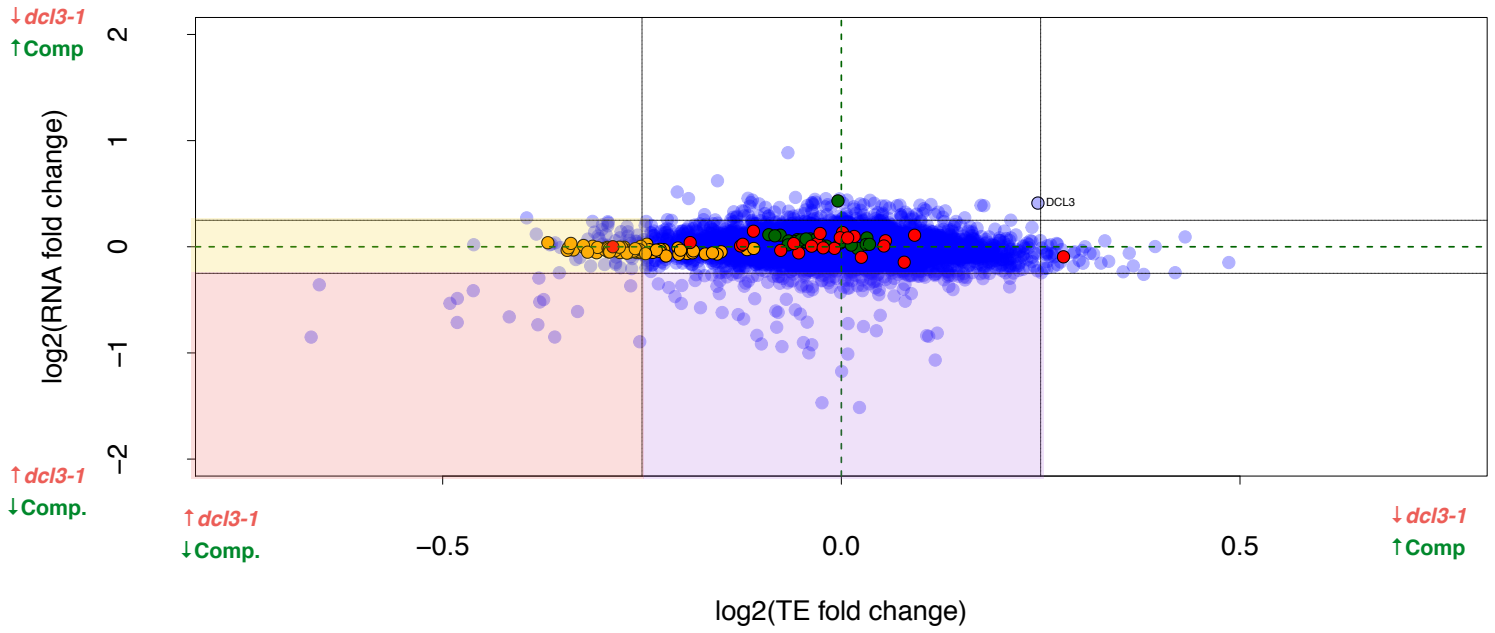

## Supplementary figure 8

Correspondence between TE and RNA fold-changes of *dcl3-1* and its corresponding complement for expressed all nuclear encode genes. All mRNAs within box A, B and C are highlighted in yellow, red and purple respectively.

**Table 4**

All expressed mRNAs and their annotation within box A, A', B, B', C and C' in supplementary figure 9. Annotations associated with the translation machinery are highlighted in green, other RNA binding proteins in red. Messenger RNAs with detectable protein in the N15 proteomics data are highlighted in blue

| <b>A (109)</b>     |                                                                                                        |
|--------------------|--------------------------------------------------------------------------------------------------------|
| Cre02.g074370.t1.2 | Protein tyrosine kinase                                                                                |
| Cre07.g312650.t1.2 |                                                                                                        |
| Cre02.g075700.t1.2 | Ribosomal protein L19, component of cytosolic 80S ribosome and 60S large subunit                       |
| Cre06.g267550.t1.2 | Bardet-Biedl syndrome-5 associated protein                                                             |
| Cre01.g018750.t1.2 |                                                                                                        |
| Cre01.g016350.t1.1 |                                                                                                        |
| Cre03.g179941.t1.1 |                                                                                                        |
| Cre01.g034600.t1.2 | WD40 repeat protein                                                                                    |
| Cre07.g325746.t1.1 | Ribosomal protein L38, component of cytosolic 80S ribosome and 60S large subunit Ribosomal protein L38 |
| Cre13.g568650.t1.2 | Ribosomal protein S3a, component of cytosolic 80S ribosome and 40S small subunit                       |
| Cre04.g222700.t1.2 | Elongation Factor 3                                                                                    |
| Cre17.g701200.t1.2 | Ribosomal protein L14, component of cytosolic 80S ribosome and 60S large subunit                       |
| Cre06.g282500.t1.2 | Ribosomal protein L23a, component of cytosolic 80S ribosome and 60S large subunit                      |
| Cre03.g165215.t1.1 | Ubiquitin-like modifier activating enzyme ATG7                                                         |
| Cre03.g174900.t1.1 | SARM1                                                                                                  |
| Cre10.g420750.t1.2 | Ribosomal protein L30, component of cytosolic 80S ribosome and 60S large subunit                       |
| Cre08.g359450.t1.2 | D-Alanine ligase                                                                                       |
| Cre01.g047750.t1.2 | Ribosomal protein L18a, component of cytosolic 80S ribosome and 60S large subunit                      |
| Cre13.g573351.t1.2 | Ribosomal protein S16, component of cytosolic 80S ribosome and 40S small subunit                       |
| Cre12.g504200.t1.2 | Ribosomal protein S23, component of cytosolic 80S ribosome and 40S small subunit                       |
| Cre02.g093850.t1.1 | Ras supressor protein                                                                                  |
| Cre09.g408950.t1.1 | Autophagy-specific Gee 2, isoform A                                                                    |
| Cre12.g493350.t1.1 |                                                                                                        |
| Cre08.g359200.t1.1 | Regulator of chromosome condensation                                                                   |
| Cre02.g091100.t1.2 | Ribosomal protein L15, component of cytosolic 80S ribosome and 60S large subunit                       |
| Cre05.g246550.t1.2 | L-amino-acid oxidase                                                                                   |
| Cre06.g289550.t1.2 | Ribosomal protein L32, component of cytosolic 80S ribosome and 60S large subunit                       |
| Cre12.g498250.t1.2 | Ribosomal protein S17, component of cytosolic 80S ribosome and 40S small subunit                       |
| Cre06.g278253.t1.1 |                                                                                                        |
| Cre11.g467772.t1.1 | D-type cyclin D-type cyclin                                                                            |



|                    |                                                                                                      |
|--------------------|------------------------------------------------------------------------------------------------------|
| <b>A cont.</b>     |                                                                                                      |
| Cre02.g106600.t1.2 | Ribosomal protein S19, component of cytosolic 80S ribosome and 40S small subunit                     |
| Cre09.g397450.t1.1 | Dimethylaniline Mnooxygenase                                                                         |
| Cre12.g521200.t1.2 | DNA replication factor C complex subunit 1                                                           |
| Cre03.g203850.t1.2 | ATP-sulfurylase                                                                                      |
| Cre11.g468353.t1.1 | Voltage-gated potassium channel                                                                      |
| Cre07.g331900.t1.2 | Ribosomal protein S13, component of cytosolic 80S ribosome and 40S small subunit                     |
| Cre24.g755647.t1.1 | YTH YT521-B homology domain-containing                                                               |
| Cre04.g214503.t1.1 | Ribosomal protein S12, component of cytosolic 80S ribosome and 40S small subunit                     |
| Cre16.g660150.t1.2 | 30S ribosomal protein S10 family member                                                              |
| Cre06.g290950.t1.2 | Ribosomal protein S5, component of cytosolic 80S ribosome and 40S small subunit                      |
| Cre01.g024900.t1.1 | RNA-binding region RNP-1 domain containing protein                                                   |
| Cre06.g280800.t1.2 | Nuclear auto antigenic sperm protein NASP-related                                                    |
| Cre12.g514500.t1.2 | Ribosomal protein S11, component of cytosolic 80S ribosome and 40S small subunit                     |
| Cre10.g424150.t1.2 | Transcription initiation factor IIA subunit 2                                                        |
| Cre06.g310700.t1.2 | Ribosomal protein L36a, component of cytosolic 80S ribosome and 60S large subunit                    |
| Cre12.g529400.t1.2 | Ribosomal protein S27e isoform 1, component of 80S ribosome and 40S small subunit                    |
| Cre13.g568900.t1.2 | Ribosomal protein L17, component of cytosolic 80S ribosome and 60S large subunit                     |
| Cre17.g701650.t1.2 | Ribosomal protein L27, component of cytosolic 80S ribosome and 60S large subunit                     |
| Cre08.g359750.t2.1 | Ribosomal protein S9, component of cytosolic 80S ribosome and 40S small subunit                      |
| Cre12.g512600.t1.2 | Ribosomal protein L18, component of cytosolic 80S ribosome and 60S large subunit                     |
| Cre12.g510450.t1.2 | Ribosomal protein S28, component of cytosolic 80S ribosome and 40S small subunit                     |
| Cre07.g322500.t1.2 | Mitochondrial ribosomal protein L19                                                                  |
| Cre05.g234637.t1.1 | Ribosomal protein S15A, component of cytosolic 80S ribosome and 40S small subunit                    |
| Cre06.g272950.t1.1 | Ribosomal protein S18, component of cytosolic 80S ribosome and 40S small subunit                     |
| Cre12.g498900.t1.2 | Ribosomal protein S7, component of cytosolic 80S ribosome and 40S small subunit                      |
| Cre07.g349950.t1.1 | Transcription initiation factor TFIID subunit 6                                                      |
| Cre02.g143527.t1.1 |                                                                                                      |
| Cre17.g714800.t1.2 | Hydroxyproline-rich cell wall protein                                                                |
| Cre07.g335200.t1.1 | Translation elongation factor EFG/EF2 related to membrane GTP-binding protein LepA                   |
| Cre02.g115200.t1.2 | Ribosomal protein L27a, component of cytosolic 80S ribosome and 60S large subunit                    |
| Cre11.g480150.t1.2 | Ribosomal protein S14, component of cytosolic 80S ribosome and 40S small subunit                     |
| Cre12.g537800.t1.2 | Ribosomal protein L7, component of cytosolic 80S ribosome and 60S large subunit                      |
| Cre08.g374100.t1.1 |                                                                                                      |
| Cre12.g494050.t1.2 | Ribosomal protein L9, component of cytosolic 80S ribosome and 60S large subunit                      |
| Cre17.g699500.t1.2 | Tubulin tyrosine ligase                                                                              |
| Cre01.g035500.t1.2 | Phosphatidylinositol-3-kinase, probably vacuolar                                                     |
| Cre17.g720300.t1.2 | Leucine-rich repeat containing protein DDB_G0281931-related                                          |
| Cre09.g399141.t1.1 | Anion transporter 5-related                                                                          |
| Cre09.g400650.t1.2 | Ribosomal protein S6, component of cytosolic 80S ribosome and 40S small subunit                      |
| Cre09.g397697.t1.1 | Ribosomal protein L4, component of cytosolic 80S ribosome and 60S large subunit Ribosomal protein L4 |
| Cre06.g257150.t1.2 | Ribosomal protein L37a, component of cytosolic 80S ribosome and 60S large subunit                    |
| Cre12.g560400.t1.1 | DnaJ-like protein                                                                                    |

| <b>A Cont.</b>     |                                                                                                                                                                      |
|--------------------|----------------------------------------------------------------------------------------------------------------------------------------------------------------------|
| Cre12.g535851.t1.1 | Ribosomal protein L8, component of cytosolic 80S ribosome and 60S large subunit                                                                                      |
| Cre03.g203450.t1.2 | Ribosomal protein S21, component of cytosolic 80S ribosome and 40S small subunit                                                                                     |
| Cre04.g211800.t1.2 | Ribosomal protein L23, component of cytosolic 80S ribosome and 60S large subunit                                                                                     |
| Cre12.g528750.t1.2 | Ribosomal protein L12, component of cytosolic 80S ribosome and 60S large subunit                                                                                     |
| Cre06.g299450.t1.2 |                                                                                                                                                                      |
| Cre03.g193400.t1.2 | RNA polymerase sigma factor RPO                                                                                                                                      |
| Cre06.g249200.t1.2 | Actin-related protein, putative SWR-C component                                                                                                                      |
| Cre08.g360900.t1.2 | Ribosomal protein S15, component of cytosolic 80S ribosome and 40S small subunit                                                                                     |
| Cre10.g427750.t1.2 | Kinesis-Like protein KIF9                                                                                                                                            |
| Cre09.g404500.t1.1 | Spindle pole body protein                                                                                                                                            |
| Cre01.g018900.t1.2 | E3-ubiquitin-protein ligase RNF14                                                                                                                                    |
| Cre16.g678550.t1.1 |                                                                                                                                                                      |
| Cre03.g177550.t1.2 | Integral membrane ankyrin-repeat protein Kidins220/26S proteasome regulatory complex, subunit PSMD10                                                                 |
| Cre16.g660750.t1.1 | MKS-6                                                                                                                                                                |
| Cre10.g459250.t1.2 | Ribosomal protein L35a, component of cytosolic 80S ribosome and 60S large subunit                                                                                    |
| Cre11.g467560.t1.1 | TPR repeat containing protein                                                                                                                                        |
| Cre01.g039250.t2.1 | Ribosomal protein S2, component of cytosolic 80S ribosome and 40S small subunit                                                                                      |
| Cre14.g630100.t1.2 | Ribosomal protein L13, component of cytosolic 80S ribosome and 60S large subunit                                                                                     |
| Cre07.g312400.t1.1 | Diacylglycerol kinase                                                                                                                                                |
| Cre06.g278135.t1.1 | Ribosomal protein L21, component of cytosolic 80S ribosome and 60S large subunit<br>Ribosomal protein L21, component of cytosolic 80S ribosome and 60S large subunit |
| Cre07.g313950.t1.1 |                                                                                                                                                                      |
| Cre02.g110000.t1.1 | Caspase regulator                                                                                                                                                    |
| Cre01.g036800.t1.1 | KIF6 Kinesin-like protein                                                                                                                                            |
| Cre10.g435400.t1.2 |                                                                                                                                                                      |
| Cre01.g040000.t1.2 | Ribosomal protein L26, component of cytosolic 80S ribosome and 60S large subunit                                                                                     |
| Cre12.g489153.t1.1 | Ribosomal protein L31, component of cytosolic 80S ribosome and 60S large subunit                                                                                     |
| Cre14.g608452.t1.1 | Ubiquitin C-terminal hydrolase                                                                                                                                       |
| Cre02.g142066.t1.1 | IQ calmodulin-binding motif                                                                                                                                          |
| Cre01.g039300.t1.2 | Polyadenylate-binding protein RB47                                                                                                                                   |
| Cre02.g103550.t1.2 | Eukaryotic translation initiation factor 1A, eIF-1A                                                                                                                  |
| Cre10.g417700.t1.2 | Ribosomal protein L3, component of cytosolic 80S ribosome and 60S large subunit                                                                                      |
| Cre08.g358556.t1.1 | Ribosomal protein S29, component of cytosolic 80S ribosome and 40S small subunit<br>Ribosomal protein S29, component of cytosolic 80S ribosome and 40S small subunit |
| Cre09.g391097.t1.1 | Ribosomal protein L24, component of cytosolic 80S ribosome and 60S large subunit<br>Ribosomal protein L24, component of cytosolic 80S ribosome and 60S large subunit |
| Cre09.g388200.t1.1 | Ribosomal protein L10, component of cytosolic 80S ribosome and 60S large subunit                                                                                     |
| Cre07.g357850.t1.2 | Ribosomal protein L22, component of cytosolic 80S ribosome and 60S large subunit                                                                                     |
| Cre16.g692200.t1.1 | Metalloproteinase of VMP family                                                                                                                                      |
| Cre06.g272800.t1.2 | Ribosomal protein S8, component of cytosolic 80S ribosome and 40S small subunit                                                                                      |

|                    |                                                 |
|--------------------|-------------------------------------------------|
| <b>B (17)</b>      |                                                 |
| Cre07.g329950.t1.1 |                                                 |
| Cre15.g634900.t1.2 |                                                 |
| Cre16.g673200.t1.2 |                                                 |
| Cre05.g239950.t1.1 |                                                 |
| Cre10.g444300.t1.2 |                                                 |
| Cre17.g704251.t1.1 |                                                 |
| Cre13.g576700.t1.1 |                                                 |
| Cre16.g675200.t1.1 |                                                 |
| Cre12.g486450.t1.2 |                                                 |
| Cre07.g325757.t1.1 |                                                 |
| Cre11.g477700.t1.1 |                                                 |
| Cre24.g755697.t1.1 |                                                 |
| Cre11.g467650.t1.1 |                                                 |
| Cre13.g585200.t1.2 |                                                 |
| Cre12.g541400.t1.2 | Las17-binding protein actin regulator (Ysc84)   |
| Cre07.g317601.t1.1 |                                                 |
| Cre06.g281450.t1.1 | Scavenger receptor cysteine rich (SRCR) protein |

|                    |                                                                                                          |
|--------------------|----------------------------------------------------------------------------------------------------------|
| <b>C (150)</b>     |                                                                                                          |
| Cre07.g317350.t1.2 |                                                                                                          |
| Cre10.g459100.t1.1 |                                                                                                          |
| Cre08.g379800.t1.2 | Alpha-2 macroglobulin family (A2M)                                                                       |
| Cre16.g677920.t1.2 |                                                                                                          |
| Cre06.g294776.t1.1 |                                                                                                          |
| Cre03.g156850.t1.1 | Sphingomyelin phosphodiesterase related                                                                  |
| Cre12.g551700.t1.2 |                                                                                                          |
| Cre13.g578750.t1.2 | PsbA translation factor                                                                                  |
| Cre07.g334150.t1.1 | Tumor necrosis factor receptor superfamily member                                                        |
| Cre14.g623900.t1.1 |                                                                                                          |
| Cre03.g143967.t1.1 |                                                                                                          |
| Cre03.g182800.t1.1 | Alanine-glyoxylate transaminase                                                                          |
| Cre06.g271200.t1.2 | NADH oxidase / H2O2-forming NADH oxidase                                                                 |
| Cre02.g095080.t1.1 | Major vault protein                                                                                      |
| Cre17.g719450.t1.1 | Ca2+/calmodulin-dependent protein kinase, EF-Hand protein superfamily // Serine/threonine protein kinase |
| Cre13.g580900.t1.1 | SERINE/THREONINE-PROTEIN KINASE RIO1                                                                     |
| Cre16.g694950.t1.1 | Non-specific serine/threonine protein kinase / Threonine-specific protein kinase                         |
| Cre07.g317450.t1.1 |                                                                                                          |
| Cre08.g358535.t1.1 |                                                                                                          |
| Cre06.g278098.t1.1 | Methylcrotonoyl-CoA carboxylase alpha subunit Methylcrotonoyl-CoA carboxylase alpha subunit              |
| Cre12.g496400.t1.1 |                                                                                                          |
| Cre14.g623850.t1.1 |                                                                                                          |

|                    |                                                                             |
|--------------------|-----------------------------------------------------------------------------|
| C cont.            |                                                                             |
| Cre06.g296700.t1.2 | Hydrogenase assembly factor/biotin synthase                                 |
| Cre16.g648350.t1.1 | PROLINE OXIDASE                                                             |
| Cre18.g748297.t1.1 |                                                                             |
| Cre07.g330900.t1.2 | RNA polymerase II transcription initiation factor TFIIA, large chain        |
| Cre09.g396438.t1.1 |                                                                             |
| Cre02.g074800.t2.1 | Adenylate/guanylate cyclase                                                 |
| Cre15.g638400.t1.2 | Universal stress protein family                                             |
| Cre04.g229050.t1.1 | INOSITOL POLYPHOSPHATE KINASE 1                                             |
| Cre35.g759297.t1.1 |                                                                             |
| Cre14.g613800.t1.1 |                                                                             |
| Cre03.g199800.t1.1 | Iron hydrogenase                                                            |
| Cre02.g096200.t1.2 | PROTEIN MEMO1                                                               |
| Cre04.g212800.t1.1 |                                                                             |
| Cre17.g701950.t1.2 |                                                                             |
| Cre09.g398450.t1.1 |                                                                             |
| Cre11.g477050.t1.1 |                                                                             |
| Cre11.g467531.t1.1 | Flagellar Associated Protein Flagellar Associated Protein                   |
| Cre12.g499700.t1.1 | MATE efflux family protein                                                  |
| Cre17.g727801.t1.1 | T-type voltage-gated Ca <sup>2+</sup> channel, pore-forming alpha1I subunit |
| Cre01.g001250.t1.2 |                                                                             |
| Cre03.g145307.t2.1 |                                                                             |
| Cre04.g225800.t1.2 | ANKYRIN REPEAT PROTEIN                                                      |
| Cre06.g278229.t1.1 | SF1 - SQUAMOSA PROMOTER-BINDING-LIKE PROTEIN 10-RELATED                     |
| Cre01.g022650.t1.2 | SF9 - BETA-UREIDOPROPIONASE                                                 |
| Cre03.g170850.t1.1 | Gametolysin / Lysin                                                         |
| Cre09.g398250.t1.1 |                                                                             |
| Cre12.g487200.t1.1 | Angio-associated migratory cell protein (contains WD40 repeats)             |
| Cre12.g499000.t1.2 | Cgr1 family (Cgr1)                                                          |
| Cre07.g348250.t1.2 | GLIOMA SUPPRESSOR CANDIDATE REGION GENE 2                                   |
| Cre05.g232150.t1.2 | Glutamate dehydrogenase                                                     |
| Cre10.g452250.t1.1 |                                                                             |
| Cre09.g388800.t1.2 | Glutamate dehydrogenase                                                     |
| Cre09.g398500.t1.1 |                                                                             |
| Cre18.g748097.t1.1 |                                                                             |
| Cre08.g360450.t1.1 | LEUCINE-RICH REPEAT-CONTAINING PROTEIN                                      |
| Cre10.g452350.t1.1 |                                                                             |
| Cre11.g468050.t1.2 | SF6 - MEMBRANE-ASSOCIATED PROTEIN VIPP1, CHLOROPLASTIC                      |
| Cre24.g755997.t1.1 | Cell wall protein pherophorin-C18                                           |
| Cre12.g555000.t1.1 |                                                                             |
| Cre14.g612950.t1.1 | Adenylate/guanylate cyclase                                                 |
| Cre10.g423250.t1.2 | NAD-dependent malate dehydrogenase                                          |
| Cre09.g393543.t1.1 | Hybrid-cluster protein Hybrid-cluster protein                               |
| Cre16.g683793.t1.1 | PESCADILLO - RELATED                                                        |
| Cre09.g393506.t1.1 | Hybrid-cluster protein                                                      |

|                    |                                                                                                                                                                 |
|--------------------|-----------------------------------------------------------------------------------------------------------------------------------------------------------------|
| C cont.            |                                                                                                                                                                 |
| Cre12.g542350.t1.2 | SF26 - SUGAR UTILIZATION REGULATORY PROTEIN IMP2                                                                                                                |
| Cre08.g358564.t1.1 | Heterokaryon incompatibility protein (HET) (HET)                                                                                                                |
| Cre16.g680700.t1.2 | Asparagine synthase (glutamine-hydrolyzing) / Glutamine-dependent asparagine synthetase                                                                         |
| Cre07.g315750.t1.2 | D-arabinitol dehydrogenase (NADP(+)) / NADP(+)-dependent D-arabinitol dehydrogenase                                                                             |
| Cre09.g399400.t1.1 | Triacylglycerol lipase                                                                                                                                          |
| Cre17.g696950.t1.1 | MEKK and related serine/threonine protein kinases                                                                                                               |
| Cre08.g367500.t1.1 | Stress-related chlorophyll a/b binding protein 2                                                                                                                |
| Cre07.g324500.t1.2 | Gametolysin / Lysin                                                                                                                                             |
| Cre15.g640200.t1.1 | KH domain (KH_1)                                                                                                                                                |
| Cre15.g643503.t1.1 | Response regulator receiver domain (Response_reg)                                                                                                               |
| Cre17.g701050.t1.2 | CELL GROWTH-REGULATING NUCLEOLAR PROTEIN                                                                                                                        |
| Cre21.g752247.t1.1 |                                                                                                                                                                 |
| Cre08.g365900.t1.2 | Stress-related chlorophyll a/b binding protein 1                                                                                                                |
| Cre03.g173550.t1.2 | F15H11.13 PROTEIN                                                                                                                                               |
| Cre11.g467632.t1.1 |                                                                                                                                                                 |
| Cre04.g224931.t1.1 |                                                                                                                                                                 |
| Cre17.g725250.t1.1 |                                                                                                                                                                 |
| Cre15.g644051.t1.1 | AAA domain (dynein-related subfamily) (AAA_5)                                                                                                                   |
| Cre02.g095076.t1.1 | Major facilitator superfamily transporter, involved in circadian rhythm control Major facilitator superfamily transporter, involved in circadian rhythm control |
| Cre06.g296300.t1.1 | Scavenger receptor cysteine rich (SRCR) protein                                                                                                                 |
| Cre02.g118300.t1.2 | DEAD box ATP-dependent RNA helicase                                                                                                                             |
| Cre02.g089500.t1.2 |                                                                                                                                                                 |
| Cre18.g749547.t1.1 |                                                                                                                                                                 |
| Cre02.g089650.t1.1 | U1 snRNP-specific protein C                                                                                                                                     |
| Cre10.g458850.t1.2 |                                                                                                                                                                 |
| Cre01.g057061.t1.1 | rRNA processing/ribosome biogenesis (RIX1)                                                                                                                      |
| Cre01.g042502.t1.1 | SF299 - LYSYL OXIDASE-RELATED                                                                                                                                   |
| Cre03.g159900.t1.1 | SF36 - SERINE/THREONINE-PROTEIN KINASE RIO2                                                                                                                     |
| Cre01.g055400.t1.2 | NUCLEOLAR AND COILED-BODY PHOSPHOPROTEIN 1                                                                                                                      |
| Cre05.g235700.t1.2 | SAPOSIN-RELATED                                                                                                                                                 |
| Cre04.g217962.t1.1 | Low-CO2-inducible protein Low-CO2-inducible protein                                                                                                             |
| Cre10.g466450.t1.1 | Splicing factor 3b, subunit 4                                                                                                                                   |
| Cre12.g539100.t1.1 | DEAD-BOX ATP-DEPENDENT RNA HELICASE 5                                                                                                                           |
| Cre03.g170750.t1.2 | Small nucleolar ribonucleoprotein U3 component                                                                                                                  |
| Cre02.g141986.t1.1 | SERINE-THREONINE PROTEIN KINASE                                                                                                                                 |
| Cre02.g095087.t1.1 | Cysteine endopeptidase Cysteine endopeptidase                                                                                                                   |
| Cre03.g155950.t1.2 |                                                                                                                                                                 |
| Cre11.g468850.t1.2 | Flagellar Associated Protein                                                                                                                                    |
| Cre14.g622150.t1.1 |                                                                                                                                                                 |
| Cre17.g731800.t1.2 | FOLLISTATIN-RELATED                                                                                                                                             |
| Cre17.g721553.t1.2 |                                                                                                                                                                 |
| Cre06.g288600.t1.1 |                                                                                                                                                                 |
| Cre07.g347300.t1.1 | L-methionine (R)-S-oxide reductase / FRMsr                                                                                                                      |

|                    |                                                                            |
|--------------------|----------------------------------------------------------------------------|
| C cont.            |                                                                            |
| Cre17.g744697.t1.1 |                                                                            |
| Cre02.g107200.t1.1 |                                                                            |
| Cre17.g701884.t1.1 |                                                                            |
| Cre09.g391726.t1.1 |                                                                            |
| Cre17.g705300.t2.1 | Cellulase / Endoglucanase                                                  |
| Cre17.g740950.t1.2 | High intensity light-inducible Lhc-like gene                               |
| Cre12.g549000.t1.2 | Cell wall protein pherophorin-C4                                           |
| Cre17.g696500.t1.1 | Cell wall protein pherophorin-C19                                          |
| Cre06.g288908.t1.2 | SF79 - NITROGEN NETWORK KINASE 1                                           |
| Cre02.g082300.t1.2 | SURFEIT LOCUS PROTEIN 6                                                    |
| Cre17.g718650.t1.2 | NOP SEVEN ASSOCIATED PROTEIN 1                                             |
| Cre02.g093750.t1.2 | Nucleoredoxin 2                                                            |
| Cre14.g624900.t1.2 | Flagellar Associated Protein                                               |
| Cre02.g109050.t1.2 | FAST LEU-RICH DOMAIN-CONTAINING                                            |
| Cre10.g426250.t1.1 | PRE-RRNA-PROCESSING PROTEIN TSR2 HOMOLOG                                   |
| Cre19.g751047.t1.1 |                                                                            |
| Cre09.g405100.t2.1 |                                                                            |
| Cre03.g177600.t1.1 | L-gulonolactone oxidase                                                    |
| Cre03.g200431.t1.1 |                                                                            |
| Cre01.g051250.t1.2 | Flagellar outer dynein arm 18 kDa light chain LC4                          |
| Cre09.g398400.t1.2 | Transient receptor potential ion channel protein                           |
| Cre02.g087150.t1.2 |                                                                            |
| Cre17.g719150.t1.2 |                                                                            |
| Cre03.g198400.t1.2 |                                                                            |
| Cre09.g402663.t1.1 |                                                                            |
| Cre08.g373650.t1.1 |                                                                            |
| Cre01.g004900.t1.2 | SF1 - THIJ/PFPI                                                            |
| Cre11.g478100.t1.2 | SnoaL-like domain (SnoaL_2)                                                |
| Cre08.g368500.t1.2 | Nucleolar RNA-binding protein NIFK                                         |
| Cre17.g739350.t1.1 |                                                                            |
| Cre06.g264500.t1.2 | TBP-binding protein, activator of basal transcription (contains rrm motif) |
| Cre03.g192201.t1.1 | Pherophorin (DUF3707)                                                      |
| Cre16.g675400.t1.1 |                                                                            |
| Cre06.g300050.t1.1 | FAST LEU-RICH DOMAIN-CONTAINING                                            |
| Cre06.g302950.t1.1 | Gametolysin peptidase M11 (Peptidase_M11)                                  |
| Cre03.g205450.t1.1 |                                                                            |
| Cre13.g587300.t1.1 |                                                                            |
| Cre13.g567200.t1.1 | SF513 - SERINE-THREONINE PROTEIN KINASE                                    |
| Cre11.g480551.t1.2 |                                                                            |
| Cre17.g717600.t1.2 |                                                                            |
| Cre07.g314500.t1.1 | Mitogen-activated protein kinase kinase kinase / MLTK                      |

|                    |                                                                                                                    |
|--------------------|--------------------------------------------------------------------------------------------------------------------|
| A' (40)            |                                                                                                                    |
| Cre03.g191950.t1.2 | RimM N-terminal domain (RimM)                                                                                      |
| Cre06.g248900.t1.1 | Leucine-rich repeat (LRR) protein associated with apoptosis in muscle tissue                                       |
| Cre12.g490700.t1.2 | Mini-eyespot protein                                                                                               |
| Cre14.g610663.t1.1 | Protein Y56A3A.33                                                                                                  |
| Cre14.g618600.t1.2 | ABC transporter, multidrug resistance associated protein                                                           |
| Cre12.g486000.t1.2 | PCDC2 PROGRAMMED CELL DEATH PROTEIN 2 -RELATED                                                                     |
| Cre06.g287200.t1.2 |                                                                                                                    |
| Cre05.g232550.t1.2 | Phosphoglycerate mutase                                                                                            |
| Cre02.g119850.t1.1 | 3',5'-cyclic-nucleotide phosphodiesterase                                                                          |
| Cre09.g411751.t1.1 |                                                                                                                    |
| Cre08.g363050.t1.2 |                                                                                                                    |
| Cre10.g451450.t1.1 | SERINE-THREONINE PROTEIN KINASE                                                                                    |
| Cre05.g241655.t1.1 |                                                                                                                    |
| Cre14.g608400.t1.2 |                                                                                                                    |
| Cre12.g548152.t1.1 | SF0 - GRAVES DISEASE CARRIER PROTEIN                                                                               |
| Cre10.g429200.t1.1 | RuBisCO methyltransferase                                                                                          |
| Cre02.g087300.t1.1 | Hydroxypyruvate reductase / D-glycerate dehydrogenase                                                              |
| Cre06.g306250.t1.1 | Receptor protein-tyrosine kinase / Receptor protein tyrosine kinase                                                |
| Cre01.g052150.t1.1 | Flagellar Associated Protein with ankyrin repeats                                                                  |
| Cre06.g269350.t1.2 | GC-RICH SEQUENCE DNA-BINDING FACTOR                                                                                |
| Cre14.g614950.t1.2 | Putative mitochondrial ribosomal protein S2, imported to mitochondria                                              |
| Cre12.g554300.t1.1 | Sodium:solute symporter                                                                                            |
| Cre17.g740390.t1.1 |                                                                                                                    |
| Cre02.g081300.t1.1 | MUTT-NUDIX-RELATED                                                                                                 |
| Cre12.g546900.t1.1 | F-BOX/LEUCINE RICH REPEAT PROTEIN                                                                                  |
| Cre13.g606200.t1.1 | SF34 - METHYLTRANSFERASE NSUN6-RELATED                                                                             |
| Cre13.g603400.t1.1 | RING-FINGER, DEAD-LIKE HELICASE, PHD AND SNF2 DOMAIN-CONTAINING PROTEIN                                            |
| Cre01.g043700.t1.2 | Tubulin-Related protein                                                                                            |
| Cre03.g190550.t1.2 | MEDIATOR COMPLEX SUBUNIT                                                                                           |
| Cre06.g271950.t1.2 | General vesicular transport factor P115                                                                            |
| Cre07.g313350.t1.2 | Acyl-lysine deacylase                                                                                              |
| Cre02.g076000.t1.2 | Serine/threonine protein kinase                                                                                    |
| Cre06.g276300.t1.1 |                                                                                                                    |
| Cre07.g318300.t1.1 | Camp-Dependent protein kinase regulatory chain                                                                     |
| Cre17.g739850.t1.2 | Predicted protein: Identified by comparative genomics as being present only in organisms having motile (MOT) cilia |
| Cre03.g198450.t1.2 |                                                                                                                    |
| Cre15.g639050.t1.1 | Zinc finger MYND domain containing protein 10                                                                      |
| Cre17.g703450.t1.1 |                                                                                                                    |
| Cre14.g623439.t1.1 | Pyroglutamyl-peptidase                                                                                             |
| Cre14.g626800.t1.1 |                                                                                                                    |

|                    |                                                                    |
|--------------------|--------------------------------------------------------------------|
| C' (118)           |                                                                    |
| Cre09.g389900.t1.1 | Hydroxyproline-rich glycoprotein                                   |
| Cre26.g756847.t1.1 | SF27 - CALCIUM-INDEPENDENT PHOSPHOLIPASE A2 IPLA2 -RELATED         |
| Cre07.g345750.t1.1 | Acetyltransferase (GNAT) domain (Acetyltransf_10)                  |
| Cre03.g207150.t1.1 | NAD(P)-binding Rossmann-like domain (NAD_binding_8)                |
| Cre12.g542202.t1.1 | MGC174333 PROTEIN                                                  |
| Cre06.g288850.t1.2 |                                                                    |
| Cre07.g345850.t1.2 |                                                                    |
| Cre17.g733400.t1.2 | Fusaric acid resistance protein-like (FUSC_2)                      |
| Cre04.g214650.t1.1 | 1,3-beta-D-glucan synthase                                         |
| Cre16.g650050.t1.2 | SF112 - RHODANESE-LIKE DOMAIN-CONTAINING PROTEIN 14, CHLOROPLASTIC |
| Cre13.g569600.t1.2 | Antibiotic biosynthesis monooxygenase (ABM)                        |
| Cre07.g336900.t1.1 |                                                                    |
| Cre17.g733950.t1.2 | CALCOFLUOR WHITE HYPERSENSITIVE PROTEIN PRECURSOR                  |
| Cre09.g386137.t1.1 |                                                                    |
| Cre17.g728550.t1.2 |                                                                    |
| Cre07.g345700.t1.2 | Coenzyme Q-binding protein                                         |
| Cre03.g200650.t1.1 | SF200 - CHITINASE                                                  |
| Cre26.g756897.t1.1 | PHD finger protein AF10                                            |
| Cre17.g734000.t1.2 | INNER MEMBRANE PROTEIN                                             |
| Cre10.g422300.t1.2 | Thioredoxin dependent peroxidase                                   |
| Cre11.g480250.t1.1 | Predicted lipase                                                   |
| Cre02.g143487.t1.1 |                                                                    |
| Cre07.g328075.t1.1 |                                                                    |
| Cre17.g734596.t1.1 |                                                                    |
| Cre10.g454250.t1.2 | Peptidyl-prolyl cis-trans isomerase, FKBP-type                     |
| Cre07.g335700.t1.2 |                                                                    |
| Cre07.g355750.t1.2 | F-BOX AND WD40 DOMAIN PROTEIN                                      |
| Cre03.g184250.t1.2 | EF-hand domain pair (EF-hand_7)                                    |
| Cre02.g079650.t1.1 | SF6 - SOLUTE CARRIER FAMILY 35 MEMBER G1                           |
| Cre12.g502250.t1.2 | Plastid lipid associated protein                                   |
| Cre12.g544450.t1.2 |                                                                    |
| Cre03.g168950.t1.2 |                                                                    |
| Cre07.g345500.t1.2 |                                                                    |
| Cre10.g463150.t1.1 | SF43 - DELTA(3,5)-DELTA(2,4)-DIENOYL-COA ISOMERASE, MITOCHONDRIAL  |
| Cre17.g707350.t1.2 |                                                                    |
| Cre17.g734200.t1.2 | L,L-diaminopimelate aminotransferase                               |
| Cre07.g327450.t1.2 | DnaJ-like protein                                                  |
| Cre13.g562526.t1.1 |                                                                    |
| Cre17.g734050.t1.1 |                                                                    |
| Cre17.g734150.t1.1 | SF16 - TIP41-LIKE PROTEIN                                          |
| Cre17.g734628.t1.1 | SF2 - ZINC FINGER PROTEIN 593                                      |
| Cre02.g143307.t1.1 | ClpC chaperone, Hsp100 family                                      |
| Cre02.g143587.t1.1 | GENERAL TRANSCRIPTION FACTOR 3C POLYPEPTIDE 2                      |
| Cre12.g537250.t1.2 |                                                                    |



|                    |                                                                                                                   |
|--------------------|-------------------------------------------------------------------------------------------------------------------|
| C' cont.           |                                                                                                                   |
| Cre17.g734612.t1.1 | ABC transporter, multidrug resistance associated protein ABC transporter, multidrug resistance associated protein |
| Cre02.g143467.t1.1 | Ulp1 peptidase / Ulp1 protease                                                                                    |
| Cre02.g076300.t1.1 | Uroporphyrinogen decarboxylase                                                                                    |
| Cre17.g734548.t1.1 | Pyruvate phosphate dikinase, chloroplastic                                                                        |
| Cre17.g734516.t1.1 | 26S proteasome regulatory subunit 26S proteasome regulatory subunit                                               |
| Cre02.g076466.t1.1 |                                                                                                                   |
| Cre12.g561350.t1.1 | SF8 - ZINC FINGER MYND DOMAIN CONTAINING PROTEIN 10                                                               |
| Cre17.g734400.t1.1 | Ubiquitin ligase SCF complex subunit Cullin                                                                       |
| Cre17.g734300.t1.1 | SF47 - TRANSLOCASE OF CHLOROPLAST 120, CHLOROPLASTIC-RELATED                                                      |
| Cre02.g085450.t1.2 | Coproporphyrinogen III oxidase                                                                                    |
| Cre02.g143567.t1.1 |                                                                                                                   |
| Cre12.g551950.t1.2 | Predicted protein                                                                                                 |
| Cre01.g032000.t1.1 | BETA CATENIN-RELATED ARMADILLO REPEAT-CONTAINING                                                                  |
| Cre04.g227400.t1.2 | Ferric-chelate reductase/ oxidoreductase                                                                          |
| Cre17.g734450.t1.2 | Plastid ribosomal protein L19                                                                                     |
| Cre17.g734100.t1.2 | Adenylosuccinate synthase / Succinoadenylic kinosynthetase                                                        |
| Cre03.g156200.t1.1 | Lectin C-type domain (Lectin_C)                                                                                   |
| Cre03.g156600.t1.2 |                                                                                                                   |
| Cre02.g103100.t1.1 | SF631 - SHORT-CHAIN DEHYDROGENASE/REDUCTASE FAMILY PROTEIN                                                        |
| Cre17.g734500.t1.2 | Vacuolar ATP synthase subunit E                                                                                   |
| Cre09.g398050.t1.1 | DIMETHYLANILINE MONOOXYGENASE                                                                                     |
| Cre01.g050950.t1.2 | Geranylgeranyl diphosphate reductase / Geranylgeranyl reductase                                                   |
| Cre12.g553500.t1.1 | Predicted protein with ankyrin repeats                                                                            |
| Cre11.g467700.t1.1 | Uroporphyrinogen-III decarboxylase                                                                                |
| Cre10.g460150.t1.2 | ERD4-related membrane protein                                                                                     |
| Cre01.g015350.t1.1 | Light-dependent protochlorophyllide reductase                                                                     |
| Cre26.g756747.t1.1 |                                                                                                                   |
| Cre05.g242000.t1.2 | Magnesium chelatase subunit D                                                                                     |
| Cre01.g045650.t1.2 | DnaJ-like zinc-finger protein                                                                                     |
| Cre17.g734644.t1.1 | Squalene monooxygenase / Squalene epoxidase                                                                       |
| Cre17.g734250.t1.1 | Non-specific protein-tyrosine kinase / Cytoplasmic protein tyrosine kinase                                        |
| Cre17.g734709.t1.1 |                                                                                                                   |
| Cre03.g167924.t1.1 | SF3 - VERY-LONG-CHAIN (3R)-3-HYDROXYACYL-[ACYL-CARRIER PROTEIN] DEHYDRATASE HPO-8                                 |
| Cre16.g663900.t1.2 | Porphobilinogen deaminase                                                                                         |
| Cre17.g734350.t1.1 |                                                                                                                   |
| Cre09.g396300.t1.2 | Protoporphyrinogen oxidase                                                                                        |
| Cre43.g760497.t1.1 | SF96 - ATP-DEPENDENT CLP PROTEASE                                                                                 |
| Cre09.g409650.t1.2 | RING-variant domain (RINGv)                                                                                       |
| Cre01.g048600.t1.1 |                                                                                                                   |
| Cre10.g443500.t1.2 | SF1 - EXPRESSED PROTEIN-RELATED                                                                                   |
| Cre16.g695850.t1.2 |                                                                                                                   |
| Cre02.g143367.t1.1 |                                                                                                                   |
| Cre26.g756797.t1.1 | SF59 - PROTEASOME SUBUNIT BETA TYPE-1                                                                             |

|                    |                                                                                               |
|--------------------|-----------------------------------------------------------------------------------------------|
| C' cont.           |                                                                                               |
| Cre02.g083800.t2.1 | dTDP-glucose 4,6-dehydratase                                                                  |
| Cre16.g674300.t1.1 | Flagellar Associated Protein                                                                  |
| Cre03.g166500.t1.2 |                                                                                               |
| Cre05.g241450.t1.2 | Chloroplast SRP Receptor                                                                      |
| Cre43.g760647.t1.1 |                                                                                               |
| Cre02.g143667.t1.1 | Plastid lipid associated protein Plastid lipid associated protein                             |
| Cre08.g358546.t1.1 |                                                                                               |
| Cre26.g756597.t1.1 | Scaffold protein Shank and related SAM domain proteins                                        |
| Cre16.g668300.t1.1 |                                                                                               |
| Cre12.g554400.t1.1 |                                                                                               |
| Cre10.g465550.t1.1 | ClpD chaperone, Hsp100 family                                                                 |
| Cre43.g760547.t1.1 |                                                                                               |
| Cre02.g110050.t1.1 | SF160 - WD40 REPEAT-CONTAINING PROTEIN                                                        |
| Cre01.g003850.t1.1 | Cytochrome P450, CYP197 superfamily                                                           |
| Cre11.g468250.t1.1 |                                                                                               |
| Cre02.g105100.t1.2 |                                                                                               |
| Cre07.g337100.t1.2 |                                                                                               |
| Cre11.g467644.t1.1 | ClpB chaperone, Hsp100 family ClpB chaperone, Hsp100 family                                   |
| Cre03.g155250.t1.2 |                                                                                               |
| Cre17.g733800.t1.1 |                                                                                               |
| Cre09.g403367.t1.1 | SF57 - MCG1031578                                                                             |
| Cre02.g143547.t1.1 | UBX-RELATED                                                                                   |
| Cre10.g455350.t1.2 |                                                                                               |
| Cre06.g299800.t1.2 | Long-chain-fatty-acid--[acyl-carrier-protein] ligase / Acyl-[acyl-carrier-protein] synthetase |
| Cre03.g191300.t1.2 | Low-CO2-inducible protein                                                                     |
| Cre12.g535100.t1.2 | Ribosomal protein S6 kinase and related proteins                                              |
| Cre17.g733650.t1.1 | 7-keto-8-aminopelargonic acid synthase                                                        |
| Cre01.g024050.t1.2 | SF3 - PROTEIN RMD-2, ISOFORM B-RELATED                                                        |
| Cre46.g761047.t1.1 | Sulfotransferase family (Sulfotransfer_3)                                                     |
| Cre04.g228208.t1.2 | Serine/threonine protein kinase                                                               |
| Cre07.g345900.t1.1 | Dicer-like protein (DCL3)                                                                     |
